# Supplementary material for: High Plasma Levels of Soluble Lectin‐like Oxidized Low‐Density Lipoprotein Receptor‐1 Are Associated With Inflammation and Cardiometabolic Risk Profiles in Pediatric Overweight and Obesity
Source: PubMed Central journal article supplement — J Am Heart Assoc. 2023 Jan 25;12(3):e8145. doi: 10.1161/JAHA.122.027042 (PMC9973661; doi:10.1161/jaha.122.027042), 2023-01-25
Supplement: JAH3-12-00e8145-s001.pdf [file JAH3-12-00e8145-s001.pdf]

## **SUPPLEMENTAL MATERIAL**

**Table S1.** Limit of detection (LOD) and % below LOD for plasma sLOX-1 and 12 selected plasma inflammatory markers.

| Label          | Protein name                                                 | UniProt | Olink panel                 | LOD, NPX | % below LOD | *Reference |
|----------------|--------------------------------------------------------------|---------|-----------------------------|----------|-------------|------------|
| sLOX-1         | Soluble lectin-like oxidized LDL receptor 1                  | P78380  | Target 96 Cardiovascular II | 2.91     | 0.0         | -          |
| CD40           | CD40L receptor                                               | P25942  | Target 96 Inflammation      | 2.55     | 0.0         | 49         |
| CD40L          | CD40L                                                        | P29965  | Target 96 Cardiovascular II | 1.70     | 0.0         | 13,49      |
| IFN-gamma      | Interferon gamma                                             | P01579  | Target 96 Inflammation      | 4.24     | 0.1         | 46         |
| IL-8           | Interleukin-8                                                | P10145  | Target 96 Cardiovascular II | 1.69     | 0.0         | 46         |
| IL-18          | Interleukin-18                                               | Q14116  | Target 96 Inflammation      | 2.02     | 0.0         | 48         |
| LAP TGF-beta-1 | Latency-associated peptide transforming growth factor beta-1 | P01137  | Target 96 Inflammation      | 1.19     | 0.0         | 50         |
| MCP-1 (CCL2)   | Monocyte chemotactic protein 1 / C-C motif chemokine 2       | P13500  | Target 96 Inflammation      | 1.84     | 0.0         | 51         |
| TNF            | Tumor necrosis factor                                        | P01375  | Target 96 Inflammation      | 0.53     | 0.0         | 13,46,47   |
| MMP-1          | Matrix metalloproteinase 1                                   | P03956  | Target 96 Inflammation      | 1.68     | 0.1         | 52         |
| MMP-7          | Matrix metalloproteinase 7                                   | P09237  | Target 96 Cardiovascular II | 3.09     | 0.0         | 52         |
| MMP-10         | Matrix metalloproteinase 10                                  | P09238  | Target 96 Inflammation      | 1.79     | 0.0         | 52         |
| MMP-12         | Matrix metalloproteinase 12                                  | P39900  | Target 96 Cardiovascular II | 1.95     | 0.0         | 52         |

\*Reference to previous studies which observed an association between inflammatory markers and (s)LOX-1 and therefore were selected *a priori* from Cardiovascular II and Inflammation Olink panels measured in the present study. *Abbreviations:* LOD, limit of detection; NPX, normalized protein expression.

**Table S2.** Estimated regression  $\beta$ -effects (95% CI) for associations of plasma sLOX-1 with plasma inflammatory markers in a pooled model.

| Inflammatory marker | n     | Pooled model | $\beta$ (95% CI)  | P Value |
|---------------------|-------|--------------|-------------------|---------|
| CD40                | 3,846 | 1            | 0.12 (0.09, 0.15) | 1.0E-12 |
|                     | 2,914 | 2            | 0.11 (0.07, 0.15) | 1.3E-08 |
| CD40L               | 3,854 | 1            | 0.16 (0.13, 0.20) | 1.8E-23 |
|                     | 2,920 | 2            | 0.15 (0.11, 0.19) | 2.1E-15 |
| IFN-gamma           | 3,846 | 1            | 0.13 (0.10, 0.16) | 4.2E-15 |
|                     | 2,914 | 2            | 0.13 (0.10, 0.17) | 3.7E-12 |
| IL-8                | 3,846 | 1            | 0.23 (0.20, 0.26) | 8.7E-46 |
|                     | 2,914 | 2            | 0.23 (0.19, 0.26) | 2.2E-33 |
| IL-18               | 3,854 | 1            | 0.29 (0.26, 0.32) | 2.1E-75 |
|                     | 2,920 | 2            | 0.30 (0.26, 0.33) | 2.5E-59 |
| LAP TGF-beta-1      | 3,846 | 1            | 0.19 (0.16, 0.22) | 1.0E-30 |
|                     | 2,914 | 2            | 0.18 (0.14, 0.22) | 8.8E-21 |
| MCP-1               | 3,846 | 1            | 0.16 (0.13, 0.19) | 3.3E-22 |
|                     | 2,914 | 2            | 0.17 (0.13, 0.20) | 3.8E-20 |
| TNF                 | 3,846 | 1            | 0.17 (0.14, 0.20) | 3.6E-27 |
|                     | 2,914 | 2            | 0.16 (0.12, 0.19) | 2.2E-19 |
| MMP-1               | 3,842 | 1            | 0.17 (0.14, 0.20) | 1.1E-25 |
|                     | 2,910 | 2            | 0.18 (0.15, 0.22) | 4.3E-23 |
| MMP-7               | 3,854 | 1            | 0.19 (0.16, 0.23) | 1.5E-33 |
|                     | 2,920 | 2            | 0.18 (0.15, 0.22) | 3.3E-23 |
| MMP-10              | 3,846 | 1            | 0.14 (0.11, 0.17) | 4.3E-19 |
|                     | 2,914 | 2            | 0.13 (0.10, 0.17) | 3.3E-13 |
| MMP-12              | 3,854 | 1            | 0.21 (0.18, 0.24) | 3.0E-48 |
|                     | 2,920 | 2            | 0.20 (0.17, 0.23) | 3.5E-33 |

*Model 1:* inflammatory marker (SD-units)  $\sim$  sLOX-1 (SD-units) + age + sex + smoking status (smoking, passive smoking, non-smoking) + BMI SDS. *Model 2:* Model 1 + puberty stage (pre-puberty, puberty/post-puberty). *Abbreviations:* CI, confidence interval; IFN-gamma, interferon gamma; IL, interleukin; LAP TGF-beta-1, latency-associated peptide transforming growth factor beta-1; MCP-1, monocyte chemotactic protein 1; MMP, matrix metalloproteinases; SDS, standard deviation score; sLOX-1, soluble lectin-like oxidized low-density lipoprotein; TNF, tumor necrosis factor.

**Table S3.** Estimated regression  $\beta$ -effects (95% CI) for the interaction between plasma sLOX-1 and weight status (overweight/obesity vs. normal weight) on plasma inflammatory markers.

| Inflammatory marker | n     | Interaction model | Overweight/Obesity |           | Normal weight     |           | $P_{\text{interaction}}$ |
|---------------------|-------|-------------------|--------------------|-----------|-------------------|-----------|--------------------------|
|                     |       |                   | $\beta$ (95% CI)   | $P$ Value | $\beta$ (95% CI)  | $P$ Value |                          |
| CD40                | 3,846 | 1                 | 0.11 (0.06, 0.15)  | 1.3E-06   | 0.14 (0.09, 0.19) | 5.8E-08   | 0.34                     |
|                     | 2,914 | 2                 | 0.10 (0.06, 0.15)  | 2.9E-05   | 0.12 (0.06, 0.17) | 6.3E-05   | 0.74                     |
| CD40L               | 3,854 | 1                 | 0.16 (0.12, 0.21)  | 2.7E-14   | 0.16 (0.11, 0.21) | 1.9E-10   | 0.86                     |
|                     | 2,920 | 2                 | 0.17 (0.12, 0.22)  | 1.9E-11   | 0.12 (0.07, 0.18) | 1.6E-05   | 0.26                     |
| IFN-gamma           | 3,846 | 1                 | 0.12 (0.08, 0.16)  | 4.3E-08   | 0.14 (0.09, 0.19) | 2.7E-08   | 0.53                     |
|                     | 2,914 | 2                 | 0.13 (0.08, 0.18)  | 2.0E-07   | 0.13 (0.07, 0.19) | 7.4E-06   | 0.98                     |
| IL-8                | 3,846 | 1                 | 0.22 (0.18, 0.26)  | 3.2E-24   | 0.24 (0.19, 0.29) | 2.4E-22   | 0.48                     |
|                     | 2,914 | 2                 | 0.23 (0.18, 0.28)  | 1.5E-20   | 0.22 (0.16, 0.27) | 5.0E-14   | 0.73                     |
| IL-18               | 3,854 | 1                 | 0.32 (0.28, 0.36)  | 5.3E-52   | 0.27 (0.22, 0.31) | 1.7E-28   | 0.09                     |
|                     | 2,920 | 2                 | 0.33 (0.28, 0.37)  | 2.6E-42   | 0.27 (0.22, 0.32) | 2.4E-22   | 0.11                     |
| LAP TGF-beta-1      | 3,846 | 1                 | 0.18 (0.14, 0.22)  | 7.7E-17   | 0.19 (0.14, 0.24) | 1.2E-14   | 0.71                     |
|                     | 2,914 | 2                 | 0.19 (0.14, 0.23)  | 1.1E-13   | 0.16 (0.10, 0.22) | 2.9E-08   | 0.53                     |
| MCP-1               | 3,846 | 1                 | 0.17 (0.12, 0.21)  | 2.7E-14   | 0.14 (0.09, 0.19) | 2.0E-08   | 0.44                     |
|                     | 2,914 | 2                 | 0.19 (0.14, 0.23)  | 1.3E-14   | 0.14 (0.09, 0.20) | 5.0E-07   | 0.22                     |
| TNF                 | 3,846 | 1                 | 0.15 (0.11, 0.19)  | 5.3E-14   | 0.18 (0.13, 0.22) | 2.0E-14   | 0.39                     |
|                     | 2,914 | 2                 | 0.16 (0.12, 0.21)  | 1.2E-12   | 0.15 (0.10, 0.20) | 3.1E-08   | 0.67                     |
| MMP-1               | 3,842 | 1                 | 0.18 (0.13, 0.22)  | 1.8E-16   | 0.15 (0.10, 0.20) | 1.5E-09   | 0.39                     |
|                     | 2,910 | 2                 | 0.20 (0.15, 0.25)  | 1.7E-16   | 0.15 (0.09, 0.20) | 3.0E-07   | 0.13                     |
| MMP-7               | 3,854 | 1                 | 0.22 (0.18, 0.27)  | 6.5E-26   | 0.16 (0.11, 0.21) | 3.9E-11   | 0.0499                   |
|                     | 2,920 | 2                 | 0.22 (0.17, 0.26)  | 3.6E-19   | 0.14 (0.09, 0.20) | 2.6E-07   | 0.0494                   |
| MMP-10              | 3,846 | 1                 | 0.15 (0.11, 0.19)  | 8.0E-13   | 0.12 (0.07, 0.17) | 1.3E-06   | 0.29                     |
|                     | 2,914 | 2                 | 0.14 (0.10, 0.19)  | 1.8E-09   | 0.10 (0.05, 0.16) | 2.2E-04   | 0.26                     |
| MMP-12              | 3,854 | 1                 | 0.22 (0.18, 0.26)  | 3.5E-31   | 0.19 (0.15, 0.23) | 1.5E-18   | 0.31                     |
|                     | 2,920 | 2                 | 0.21 (0.17, 0.25)  | 6.0E-23   | 0.17 (0.12, 0.22) | 1.7E-11   | 0.18                     |

*Model 1:* inflammatory marker (SD-units)  $\sim$  sLOX-1 (SD-units)  $\times$  weight status (overweight/obesity vs. normal weight) + age + sex + smoking status (smoking, passive smoking, non-smoking). *Model 2:* Model 1 + puberty stage (pre-puberty, puberty/post-puberty).

*Abbreviations:* CI, confidence interval; IFN-gamma, interferon gamma; IL, interleukin; LAP TGF-beta-1, latency-associated peptide transforming growth factor beta-1; MCP-1, monocyte chemotactic protein 1; MMP, matrix metalloproteinases; SD, standard deviation; sLOX-1, soluble lectin-like oxidized low-density lipoprotein; TNF, tumor necrosis factor.

**Table S4.** Estimated regression  $\beta$ -effects (95% CI) for the interaction between plasma sLOX-1 and puberty stage (pre-puberty vs. puberty/post-puberty) on plasma inflammatory markers.

| Inflammatory marker | n     | Pre-puberty       |           | Puberty/post-puberty |           | $P_{\text{interaction}}$ |
|---------------------|-------|-------------------|-----------|----------------------|-----------|--------------------------|
|                     |       | $\beta$ (95% CI)  | $P$ Value | $\beta$ (95% CI)     | $P$ Value |                          |
| CD40                | 2,914 | 0.07 (0.01, 0.13) | 0.03      | 0.13 (0.08, 0.17)    | 4.1E-08   | 0.13                     |
| CD40L               | 2,920 | 0.12 (0.06, 0.18) | 1.4E-04   | 0.17 (0.12, 0.21)    | 1.1E-12   | 0.24                     |
| IFN-gamma           | 2,914 | 0.14 (0.08, 0.21) | 7.7E-06   | 0.13 (0.08, 0.17)    | 7.1E-08   | 0.68                     |
| IL-8                | 2,914 | 0.22 (0.16, 0.28) | 3.8E-12   | 0.23 (0.19, 0.28)    | 1.8E-23   | 0.72                     |
| IL-18               | 2,920 | 0.31 (0.25, 0.37) | 2.9E-24   | 0.29 (0.25, 0.34)    | 1.4E-38   | 0.66                     |
| LAP TGF-beta-1      | 2,914 | 0.15 (0.09, 0.22) | 1.2E-06   | 0.19 (0.15, 0.24)    | 4.6E-16   | 0.35                     |
| MCP-1               | 2,914 | 0.17 (0.11, 0.23) | 3.0E-08   | 0.17 (0.12, 0.21)    | 1.2E-13   | 0.96                     |
| TNF                 | 2,914 | 0.13 (0.07, 0.19) | 1.1E-05   | 0.17 (0.13, 0.22)    | 1.0E-15   | 0.21                     |
| MMP-1               | 2,910 | 0.22 (0.16, 0.28) | 3.7E-12   | 0.17 (0.12, 0.21)    | 3.2E-13   | 0.20                     |
| MMP-7               | 2,920 | 0.17 (0.11, 0.23) | 1.8E-08   | 0.19 (0.14, 0.23)    | 1.2E-16   | 0.69                     |
| MMP-10              | 2,914 | 0.14 (0.08, 0.20) | 3.0E-06   | 0.13 (0.08, 0.17)    | 1.5E-08   | 0.68                     |
| MMP-12              | 2,920 | 0.18 (0.12, 0.23) | 1.3E-10   | 0.21 (0.17, 0.25)    | 6.2E-25   | 0.33                     |

*Model:* inflammatory marker (SD-units)  $\sim$  sLOX-1 (SD-units)  $\times$  puberty stage (pre-puberty vs. puberty/post-puberty) + age + sex + smoking status (smoking, passive smoking, non-smoking) + BMI SDS. *Abbreviations:* CI, confidence interval; IFN-gamma, interferon gamma; IL, interleukin; LAP TGF-beta-1, latency-associated peptide transforming growth factor beta-1; MCP-1, monocyte chemotactic protein 1; MMP, matrix metalloproteinases; SDS, standard deviation score; sLOX-1, soluble lectin-like oxidized low-density lipoprotein; TNF, tumor necrosis factor.

**Table S5.** Estimated regression  $\beta$ -effects (95% CI) for associations of plasma sLOX-1 with cardiometabolic risk factors in a pooled model.

| Cardiometabolic risk factor                            | n     | Pooled model | $\beta$ (95% CI)     | P Value |
|--------------------------------------------------------|-------|--------------|----------------------|---------|
| BMI SDS †                                              | 3,854 | 1            | 0.08 (0.05, 0.12)    | 1.5E-07 |
|                                                        | 2,920 | 2            | 0.08 (0.05, 0.12)    | 8.9E-06 |
| Waist SDS †                                            | 3,464 | 1            | 0.09 (0.06, 0.12)    | 9.9E-08 |
|                                                        | 2,589 | 2            | 0.09 (0.06, 0.13)    | 9.7E-07 |
| Body fat % (log) †                                     | 1,861 | 1            | 0.11 (0.06, 0.15)    | 5.7E-06 |
|                                                        | 1,483 | 2            | 0.10 (0.06, 0.15)    | 7.2E-06 |
| Fasting plasma ALT, U/L (log)                          | 3,790 | 1            | 0.10 (0.07, 0.13)    | 7.7E-10 |
|                                                        | 2,902 | 2            | 0.09 (0.06, 0.13)    | 2.6E-07 |
| Fasting serum hs-CRP, mg/L (log)                       | 2,176 | 1            | 0.12 (0.08, 0.17)    | 9.3E-08 |
|                                                        | 1,160 | 2            | 0.15 (0.09, 0.20)    | 3.8E-08 |
| HOMA-IR, mIU/L (log)                                   | 3,794 | 1            | 0.02 (-0.01, 0.05)   | 0.12    |
|                                                        | 2,881 | 2            | 0.04 (0.01, 0.07)    | 0.009   |
| Fasting whole blood HbA <sub>1c</sub> , mmol/mol (log) | 3,784 | 1            | 0.00 (-0.03, 0.04)   | 0.80    |
|                                                        | 2,900 | 2            | -0.01 (-0.04, 0.03)  | 0.69    |
| Fasting plasma HDL-C, mmol/L (log)                     | 3,775 | 1            | -0.07 (-0.10, -0.04) | 8.3E-07 |
|                                                        | 2,892 | 2            | -0.08 (-0.12, -0.05) | 7.6E-07 |
| Fasting plasma LDL-C, mmol/L (log)                     | 3,775 | 1            | 0.08 (0.04, 0.11)    | 3.2E-06 |
|                                                        | 2,892 | 2            | 0.05 (0.02, 0.09)    | 0.004   |
| Fasting plasma triglycerides, mmol/L (log)             | 3,775 | 1            | 0.12 (0.09, 0.15)    | 2.0E-16 |
|                                                        | 2,892 | 2            | 0.12 (0.09, 0.16)    | 5.3E-14 |
| SBP SDS                                                | 3,472 | 1            | 0.05 (0.01, 0.08)    | 0.005   |
|                                                        | 2,619 | 2            | 0.04 (0.01, 0.08)    | 0.03    |
| DBP SDS                                                | 3,472 | 1            | 0.10 (0.07, 0.13)    | 3.1E-09 |
|                                                        | 2,619 | 2            | 0.09 (0.06, 0.13)    | 1.6E-06 |

*Model 1:* cardiometabolic risk factor (SD-units) ~ sLOX-1 (SD-units) + age + sex + smoking status (smoking, passive smoking, non-smoking) + BMI SDS. *Model 2:* Model 1 + puberty stage (pre-puberty, puberty/post-puberty). † Represents cardiometabolic risk factors which were not adjusted for BMI SDS. *Abbreviations:* ALT, alanine aminotransferase; CI, confidence interval; DBP, diastolic blood pressure; HbA<sub>1c</sub>, hemoglobin A<sub>1c</sub>; HDL-C, high-density lipoprotein cholesterol; HOMA-IR, homeostasis model assessment of insulin resistance; hs-CRP, high-sensitivity C-reactive protein; LDL-C, low-density lipoprotein cholesterol; SBP, systolic blood pressure; SDS, standard deviation score; sLOX-1, soluble lectin-like oxidized low-density lipoprotein receptor-1.

**Table S6.** Estimated regression  $\beta$ -effects (95% CI) for the interaction between plasma sLOX-1 and weight status (overweight/obesity vs. normal weight) on cardiometabolic risk factors.

| Cardiometabolic risk factor                            | n     | Interaction model | Overweight/Obesity   |           | Normal weight        |           | $P_{\text{interaction}}$ |
|--------------------------------------------------------|-------|-------------------|----------------------|-----------|----------------------|-----------|--------------------------|
|                                                        |       |                   | $\beta$ (95% CI)     | $P$ Value | $\beta$ (95% CI)     | $P$ Value |                          |
| Fasting plasma ALT, U/L (log)                          | 3,672 | 1                 | 0.11 (0.07, 0.15)    | 3.6E-07   | 0.10 (0.05, 0.15)    | 3.6E-05   | 0.82                     |
|                                                        | 2,816 | 2                 | 0.11 (0.07, 0.16)    | 1.1E-06   | 0.08 (0.03, 0.14)    | 0.003     | 0.35                     |
| Fasting serum hs-CRP, mg/L (log)                       | 1,556 | 1                 | 0.16 (0.11, 0.22)    | 5.1E-09   | 0.03 (-0.06, 0.11)   | 0.57      | 0.008                    |
|                                                        | 1,142 | 2                 | 0.18 (0.11, 0.24)    | 2.4E-08   | 0.07 (-0.04, 0.18)   | 0.20      | 0.11                     |
| HOMA-IR, mIU/L (log)                                   | 3,676 | 1                 | 0.08 (0.04, 0.11)    | 2.1E-05   | -0.02 (-0.06, 0.02)  | 0.39      | 5.3E-04                  |
|                                                        | 2,794 | 2                 | 0.09 (0.05, 0.13)    | 7.0E-06   | 0.01 (-0.04, 0.06)   | 0.71      | 0.008                    |
| Fasting whole blood HbA <sub>1c</sub> , mmol/mol (log) | 3,666 | 1                 | 0.03 (-0.01, 0.08)   | 0.12      | -0.03 (-0.08, 0.02)  | 0.17      | 0.04                     |
|                                                        | 2,814 | 2                 | 0.01 (-0.04, 0.06)   | 0.67      | -0.03 (-0.08, 0.03)  | 0.35      | 0.32                     |
| Fasting plasma HDL-C, mmol/L (log)                     | 3,658 | 1                 | -0.07 (-0.11, -0.03) | 2.9E-04   | -0.09 (-0.14, -0.05) | 3.5E-05   | 0.45                     |
|                                                        | 2,807 | 2                 | -0.08 (-0.12, -0.03) | 7.9E-04   | -0.12 (-0.17, -0.07) | 7.7E-06   | 0.22                     |
| Fasting plasma LDL-C, mmol/L (log)                     | 3,658 | 1                 | 0.12 (0.08, 0.16)    | 2.4E-08   | 0.02 (-0.02, 0.07)   | 0.32      | 0.003                    |
|                                                        | 2,807 | 2                 | 0.10 (0.05, 0.15)    | 3.3E-05   | 0.00 (-0.06, 0.06)   | 0.99      | 0.006                    |
| Fasting plasma triglycerides, mmol/L (log)             | 3,658 | 1                 | 0.15 (0.11, 0.19)    | 2.7E-14   | 0.10 (0.06, 0.15)    | 3.9E-06   | 0.12                     |
|                                                        | 2,807 | 2                 | 0.15 (0.11, 0.20)    | 3.4E-12   | 0.11 (0.06, 0.16)    | 1.1E-05   | 0.22                     |
| SBP SDS                                                | 3,366 | 1                 | 0.04 (0.00, 0.08)    | 0.08      | 0.06 (0.01, 0.12)    | 0.02      | 0.47                     |
|                                                        | 2,544 | 2                 | 0.03 (-0.02, 0.08)   | 0.25      | 0.08 (0.02, 0.14)    | 0.01      | 0.21                     |
| DBP SDS                                                | 3,366 | 1                 | 0.09 (0.05, 0.14)    | 1.1E-05   | 0.11 (0.06, 0.16)    | 2.4E-05   | 0.61                     |
|                                                        | 2,544 | 2                 | 0.09 (0.04, 0.14)    | 3.4E-04   | 0.12 (0.06, 0.18)    | 1.5E-04   | 0.43                     |

*Model 1:* cardiometabolic risk factor (SD-units)  $\sim$  sLOX-1 (SD-units)  $\times$  weight status (overweight/obesity vs. normal weight) + age + sex + smoking status (smoking, passive smoking, non-smoking). *Model 2:* Model 1 + puberty stage (pre-puberty, puberty/post-puberty). Cardiometabolic risk factors: BMI SDS, waist SDS, and body fat % were not assessed in the interaction model with weight status. *Abbreviations:* ALT, alanine aminotransferase; CI, confidence interval; DBP, diastolic blood pressure; HbA<sub>1c</sub>, hemoglobin A<sub>1c</sub>; HDL-C, high-density lipoprotein cholesterol; HOMA-IR, homeostasis model assessment of insulin resistance; hs-CRP, high-sensitivity C-reactive protein; LDL-C, low-density lipoprotein cholesterol; SBP, systolic blood pressure; SDS, standard deviation score; sLOX-1, soluble lectin-like oxidized low-density lipoprotein receptor-1.

**Table S7.** Estimated regression  $\beta$ -effects (95% CI) for the interaction between fasting plasma sLOX-1 and puberty stage (pre-puberty vs. puberty/post-puberty) on cardiometabolic risk factors.

| Cardiometabolic risk factor                            | n     | Pre-puberty          |           | Puberty/post-puberty |           | $P_{\text{interaction}}$ |
|--------------------------------------------------------|-------|----------------------|-----------|----------------------|-----------|--------------------------|
|                                                        |       | $\beta$ (95% CI)     | $P$ Value | $\beta$ (95% CI)     | $P$ Value |                          |
| BMI SDS †                                              | 2,920 | -0.02 (-0.08, 0.04)  | 0.51      | 0.13 (0.09, 0.18)    | 1.8E-09   | 3.9E-05                  |
| Waist SDS †                                            | 2,869 | 0.02 (-0.05, 0.08)   | 0.61      | 0.13 (0.09, 0.18)    | 1.5E-08   | 0.004                    |
| Body fat % (log) †                                     | 1,483 | 0.05 (-0.03, 0.13)   | 0.20      | 0.13 (0.08, 0.19)    | 3.8E-06   | 0.09                     |
| Fasting plasma ALT, U/L (log)                          | 2,902 | 0.04 (-0.02, 0.10)   | 0.16      | 0.12 (0.07, 0.16)    | 7.6E-08   | 0.04                     |
| Fasting serum hs-CRP, mg/L (log)                       | 1,160 | 0.13 (0.03, 0.23)    | 0.01      | 0.15 (0.09, 0.21)    | 8.9E-07   | 0.69                     |
| HOMA-IR, mIU/L (log)                                   | 2,881 | -0.03 (-0.08, 0.02)  | 0.22      | 0.08 (0.04, 0.11)    | 4.1E-05   | 6.5E-04                  |
| Fasting whole blood HbA <sub>1c</sub> , mmol/mol (log) | 2,900 | -0.01 (-0.07, 0.06)  | 0.87      | -0.01 (-0.05, 0.04)  | 0.71      | 0.93                     |
| Fasting plasma HDL-C, mmol/L (log)                     | 2,892 | -0.10 (-0.15, -0.04) | 6.1E-04   | -0.08 (-0.12, -0.04) | 2.6E-04   | 0.55                     |
| Fasting plasma LDL-C, mmol/L (log)                     | 2,892 | 0.09 (0.03, 0.15)    | 0.005     | 0.03 (-0.01, 0.08)   | 0.13      | 0.17                     |
| Fasting plasma triglycerides, mmol/L (log)             | 2,892 | 0.08 (0.03, 0.13)    | 0.004     | 0.15 (0.11, 0.19)    | 3.9E-13   | 0.046                    |
| SBP SDS                                                | 2,619 | 0.03 (-0.03, 0.10)   | 0.32      | 0.05 (0.00, 0.10)    | 0.04      | 0.41                     |
| DBP SDS                                                | 2,619 | 0.11 (0.05, 0.17)    | 6.9E-04   | 0.08 (0.04, 0.13)    | 4.6E-04   | 0.88                     |

*Model:* cardiometabolic risk factor (SD-units)  $\sim$  sLOX-1 (SD-units)  $\times$  puberty stage (pre-puberty vs. puberty/post-puberty) + age + sex + smoking status (smoking, passive smoking, non-smoking) + BMI SDS. † Represents cardiometabolic risk factors which were not adjusted for BMI SDS. *Abbreviations:* ALT, alanine aminotransferase; CI, confidence interval; DBP, diastolic blood pressure; HbA<sub>1c</sub>, hemoglobin A<sub>1c</sub>; HDL-C, high-density lipoprotein cholesterol; HOMA-IR, homeostasis model assessment of insulin resistance; hs-CRP, high-sensitivity C-reactive protein; LDL-C, low-density lipoprotein cholesterol; SBP, systolic blood pressure; SDS, standard deviation score; sLOX-1, soluble lectin-like oxidized low-density lipoprotein receptor-1.



**Table S8.** Estimated OR (95% CI) for associations of fasting plasma sLOX-1 (and hs-CRP for comparison) with cardiometabolic risk features in a pooled model.

| Cardiometabolic risk feature | Predictor | n     | Pooled model | OR (95% CI)       | P Value |
|------------------------------|-----------|-------|--------------|-------------------|---------|
| High ALT                     | sLOX-1    | 3,790 | 1            | 1.16 (1.08, 1.25) | 4.1E-04 |
|                              |           | 2,902 | 2            | 1.17 (1.08, 1.26) | 9.1E-04 |
|                              | hs-CRP    | 1,564 | 1            | 1.03 (0.97, 1.10) | 0.34    |
|                              |           | 1,157 | 2            | 1.00 (0.93, 1.08) | 0.93    |
| Insulin resistance           | sLOX-1    | 3,702 | 1            | 1.16 (1.07, 1.25) | 8.6E-04 |
|                              |           | 2,800 | 2            | 1.17 (1.07, 1.27) | 0.001   |
|                              | hs-CRP    | 1,539 | 1            | 1.03 (0.96, 1.10) | 0.36    |
|                              |           | 1,126 | 2            | 1.03 (0.96, 1.11) | 0.37    |
| Hyperglycemia                | sLOX-1    | 3,770 | 1            | 1.08 (0.98, 1.18) | 0.13    |
|                              |           | 2,890 | 2            | 1.10 (0.98, 1.21) | 0.11    |
|                              | hs-CRP    | 1,551 | 1            | 1.02 (0.95, 1.09) | 0.51    |
|                              |           | 1,148 | 2            | 1.01 (0.93, 1.09) | 0.80    |
| Dyslipidemia                 | sLOX-1    | 3,775 | 1            | 1.25 (1.17, 1.33) | 1.8E-07 |
|                              |           | 2,892 | 2            | 1.25 (1.16, 1.34) | 2.5E-06 |
|                              | hs-CRP    | 1,554 | 1            | 1.07 (1.00, 1.13) | 0.043   |
|                              |           | 1,150 | 2            | 1.07 (1.00, 1.14) | 0.08    |
| Hypertension                 | sLOX-1    | 3,472 | 1            | 1.12 (1.02, 1.21) | 0.02    |
|                              |           | 2,619 | 2            | 1.09 (0.98, 1.19) | 0.13    |
|                              | hs-CRP    | 1,530 | 1            | 0.99 (0.90, 1.07) | 0.77    |
|                              |           | 1,135 | 2            | 1.00 (0.90, 1.09) | 0.96    |

*Model 1:* cardiometabolic risk feature (0/1) ~ sLOX-1 or hs-CRP (SD-units) + age + sex + smoking status (smoking, passive smoking, non-smoking) + BMI SDS. *Model 2:* Model 1 + puberty stage (pre-puberty, puberty/post-puberty). *Abbreviations:* CI, confidence interval; high ALT, high alanine transaminase (surrogate measure of hepatic steatosis); hs-CRP, high sensitivity C-reactive protein; OR, odds ratio; SDS, standard deviation score; sLOX-1, soluble lectin-like oxidized low-density lipoprotein receptor-1.

**Table S9.** Estimated OR (95% CI) for the interaction between fasting plasma sLOX-1 and weight status (overweight/obesity vs. normal weight) on cardiometabolic risk features.

| Cardiometabolic risk feature | n     | Overweight/Obesity |           | Normal weight     |           | $P_{\text{interaction}}$ |
|------------------------------|-------|--------------------|-----------|-------------------|-----------|--------------------------|
|                              |       | OR (95% CI)        | $P$ Value | OR (95% CI)       | $P$ Value |                          |
| High ALT                     | 3,672 | 1.20 (1.10, 1.30)  | 1.9E-04   | 1.16 (1.00, 1.32) | 0.06      | 0.73                     |
|                              | 2,816 | 1.21 (1.10, 1.32)  | 5.1E-04   | 1.17 (1.00, 1.34) | 0.07      | 0.72                     |
| Insulin resistance           | 3,588 | 1.24 (1.15, 1.33)  | 3.3E-06   | 1.10 (0.91, 1.30) | 0.33      | 0.29                     |
|                              | 2,717 | 1.24 (1.14, 1.35)  | 3.2E-05   | 1.16 (0.94, 1.39) | 0.18      | 0.59                     |
| Hyperglycemia                | 3,652 | 1.16 (1.05, 1.27)  | 0.01      | 0.95 (0.75, 1.15) | 0.59      | 0.08                     |
|                              | 2,804 | 1.17 (1.04, 1.29)  | 0.02      | 1.00 (0.76, 1.24) | 0.98      | 0.27                     |
| Dyslipidemia                 | 3,658 | 1.29 (1.20, 1.38)  | 1.3E-07   | 1.24 (1.08, 1.40) | 0.009     | 0.67                     |
|                              | 2,807 | 1.30 (1.20, 1.41)  | 1.2E-06   | 1.23 (1.05, 1.40) | 0.03      | 0.56                     |
| Hypertension                 | 3,366 | 1.16 (1.05, 1.29)  | 0.006     | 1.04 (0.87, 1.25) | 0.65      | 0.30                     |
|                              | 2,544 | 1.15 (1.02, 1.30)  | 0.02      | 0.95 (0.76, 1.19) | 0.68      | 0.14                     |

*Model 1:* cardiometabolic risk feature (0/1) ~ sLOX-1 (SD-units) × weight status (overweight/obesity vs. normal weight) + age + sex + smoking status (smoking, passive smoking, non-smoking). *Model 2:* Model 1 + puberty stage (pre-puberty, puberty/post-puberty). *Abbreviations:* CI, confidence interval; high ALT, high alanine transaminase (surrogate measure of hepatic steatosis); OR, odds ratio; SD, standard deviation; sLOX-1, soluble lectin-like oxidized low-density lipoprotein receptor-1.

**Table S10.** Estimated OR (95% CI) for the interaction between fasting plasma sLOX-1 and puberty stage (pre-puberty vs. puberty/post-puberty) on cardiometabolic risk features.

| Cardiometabolic risk feature | n     | Pre-puberty       |           | Puberty/post-puberty |           | $P_{\text{interaction}}$ |
|------------------------------|-------|-------------------|-----------|----------------------|-----------|--------------------------|
|                              |       | OR (95% CI)       | $P$ Value | OR (95% CI)          | $P$ Value |                          |
| High ALT                     | 2,902 | 1.19 (1.08, 1.30) | 0.003     | 1.13 (0.97, 1.29)    | 0.13      | 0.62                     |
| Insulin resistance           | 2,800 | 1.13 (1.01, 1.25) | 0.047     | 1.26 (1.1, 1.43)     | 0.006     | 0.29                     |
| Hyperglycemia                | 2,890 | 1.09 (0.95, 1.22) | 0.22      | 1.13 (0.91, 1.34)    | 0.27      | 0.77                     |
| Dyslipidemia                 | 2,892 | 1.24 (1.13, 1.35) | 2.2E-04   | 1.27 (1.11, 1.44)    | 0.003     | 0.78                     |
| Hypertension                 | 2,619 | 1.09 (0.91, 1.29) | 0.35      | 1.08 (0.95, 1.24)    | 0.23      | 0.98                     |

*Model:* cardiometabolic risk feature (0/1) ~ sLOX-1 (SD-units) × puberty stage (pre-puberty vs. puberty/post-puberty) + age + sex + smoking status (smoking, passive smoking, non-smoking) + BMI SDS. *Abbreviations:* CI, confidence interval; high ALT, high alanine transaminase (surrogate measure of hepatic steatosis); OR, odds ratio; SDS, standard deviation score; sLOX-1, soluble lectin-like oxidized low-density lipoprotein receptor-1.

**Figure S1.** Smoothed age- and sex- specific percentile curves (2.5, 50, 97.5) for fasting plasma sLOX-1 NPX levels.

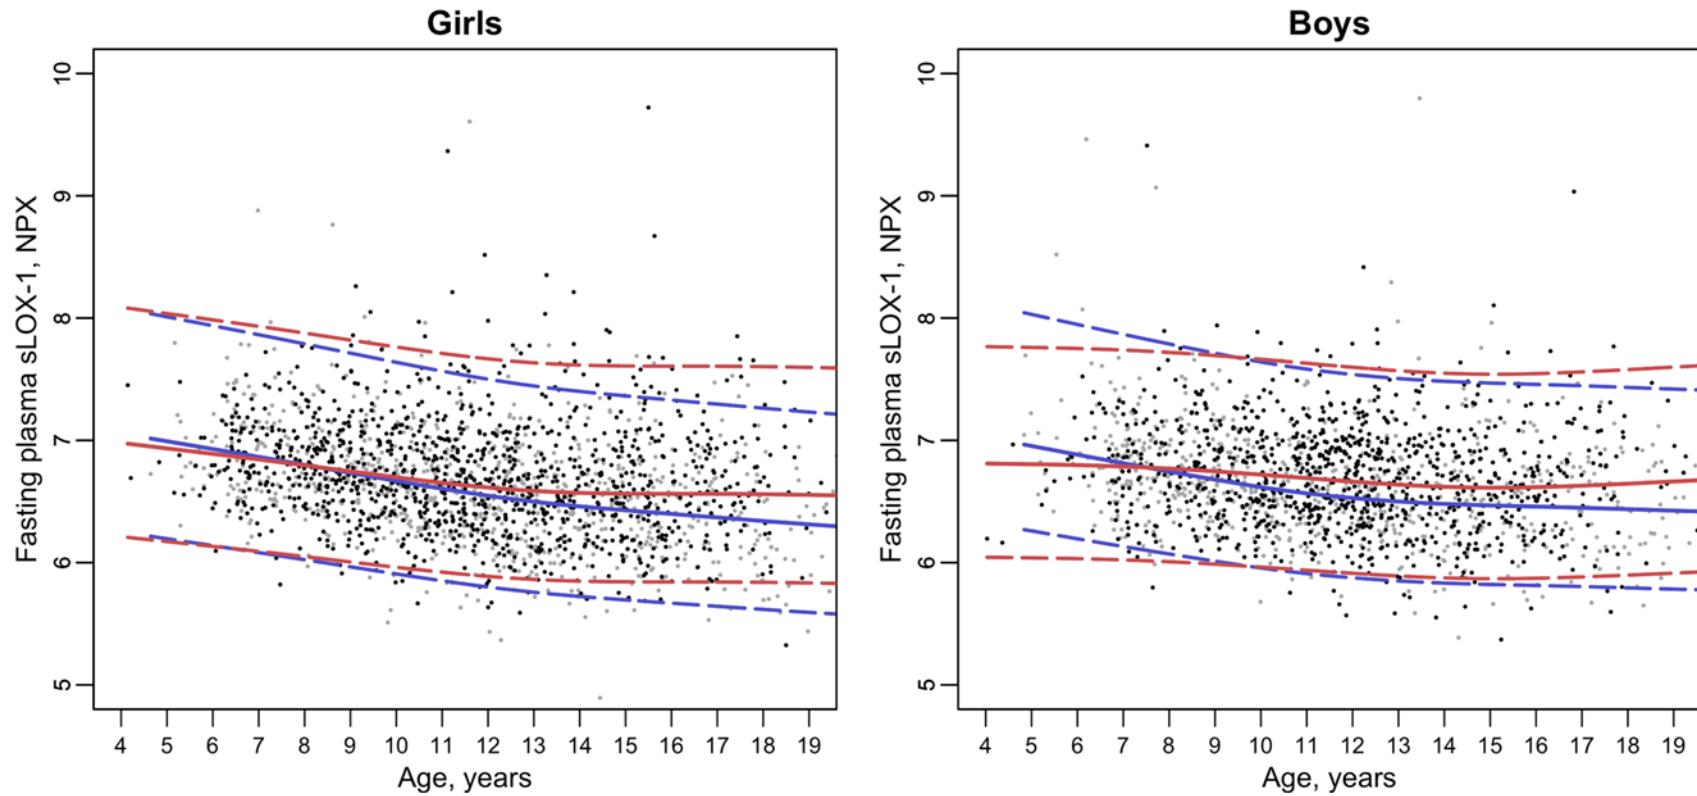

Generalized Additive Models for Location, Scale and Shape (GAMLSS) were performed in R, using the Box-Cox transformation distribution family to account for skewness, with the best fit determined by the Akaike Information Criterion (AIC). The obesity clinic group is represented by red lines and black points and the population-based group is represented by blue lines and light grey points. *Abbreviations:* NPX, normalized protein expression; sLOX-1, soluble lectin-like oxidized low-density lipoprotein receptor-1.
